# Supplementary material
Source: PubMed Central journal article supplement (PMC1914212)
Supplement: plntphys_pp.107.097568_1.pdf [file plntphys_pp.107.097568_1.pdf]

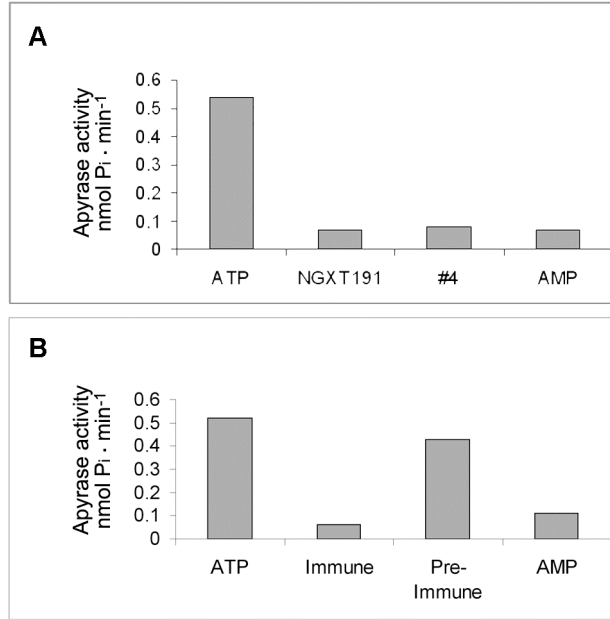

**Supplemental Figure S1.** Apyrase activity released from Arabidopsis pollen is inhibited by A, Apyrase Inhibitor no. 4, NGXT191, and by B, polyclonal anti-apyrase antibodies. Apyrase activity is defined as NTPDase activity that is insensitive to various inhibitors of ATPases and acid and alkaline phosphatases, as described in Steinebrunner et al. (2000).
