# Supplementary material
Source: PubMed Central journal article supplement (PMC1914212)
Supplement: plntphys_pp.107.097568_2.pdf [file plntphys_pp.107.097568_2.pdf]

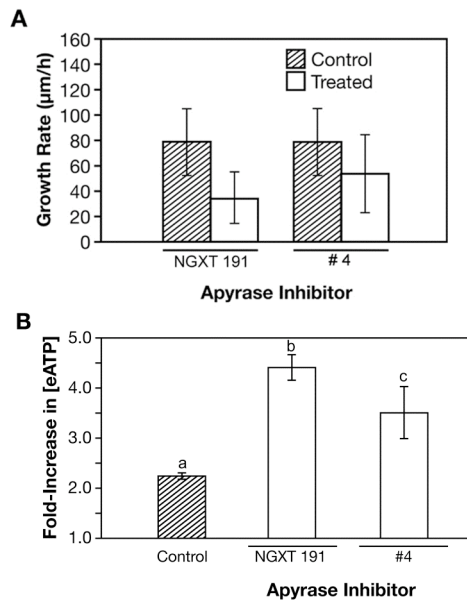

**Supplemental Figure 2.** A, Treatment of growing pollen tubes with apyrase inhibitors rapidly decreases their growth rate. For both inhibitor treatments, the difference in growth rates of Treated tubes is significantly different from that of Control tubes ( $p \leq 0.01$ ,  $n$  in every case  $> 20$ ). B, Treatment of growing pollen tubes with apyrase inhibitors rapidly increases the concentration of eATP in the pollen growth medium. The [eATP] was measured in the medium at 1 min and 15 min after addition of treatment solution, and the bar height gives the average fold-increase in [eATP]  $\pm$  SD between the two time points comparisons. The average [eATP] at 1 min was  $20.3 \pm 2.8$  nM for buffer controls,  $18.4 \pm 1.5$  nM for samples treated with inhibitor NGXT 191, and  $17.7 \pm 0.58$  nM for samples treated with inhibitor #4. Different letters above the bars indicate mean values that are significantly different from one another ( $p < 0.05$ ;  $n = 4$ ).
